1 **Tracing Autism Traits in Large Multiplex Families to Identify Endophenotypes of the**  
2 **Broader Autism Phenotype**

3 **Author List:** Krysta J Trevis<sup>#1,2</sup>, Natasha J Brown<sup>#3,4,5</sup>, Cherie Green<sup>1,2</sup>, Paul Lockhart<sup>^6,7</sup>, Peter  
4 Hickey<sup>^3</sup>, Miriam Fanjul-Fernández<sup>^8</sup>, Catherine Bromhead<sup>^3</sup>, Tarishi Desai<sup>2,1</sup>, Tanya Vick<sup>5</sup>,  
5 Greta Gillies<sup>6</sup>, Hayley Mountford<sup>6</sup>, Elizabeth Fitzpatrick<sup>6</sup>, Lavinia Gordon<sup>8</sup>, Peter Hewson<sup>5</sup>,  
6 Vicki Anderson<sup>8,2</sup>, Martin B Delatycki<sup>6,3,7</sup>, Ingrid E Scheffer<sup>+1,4,9,8</sup>, Sarah J Wilson<sup>+\*1,2</sup>

7 <sup>#, ^, +</sup> These authors contributed equally

8 \*Corresponding author: Professor Sarah Wilson, Melbourne School of Psychological Sciences,  
9 The University of Melbourne, 3010, Australia. e-mail: sarahw@unimelb.edu.au

10 Affiliations

- 11 1. Department of Medicine, The University of Melbourne, Austin Health, Melbourne,  
12 Australia
- 13 2. Melbourne School of Psychological Sciences, The University of Melbourne,  
14 Melbourne, Australia
- 15 3. Victorian Clinical Genetics Services, Murdoch Children's Research Institute,  
16 Victoria, Australia
- 17 4. Royal Children's Hospital Department of Paediatrics, The University of Melbourne,  
18 Melbourne, Australia
- 19 5. Barwon Health, Geelong, Australia
- 20 6. Bruce Lefroy Centre for Genetic Health Research, Murdoch Children's Research  
21 Institute, Melbourne, Australia
- 22 7. Department of Paediatrics, The University of Melbourne, Melbourne, Australia
- 23 8. Murdoch Children's Research Institute, Melbourne, Australia
- 24 9. Florey Institute, Melbourne, Australia

25 Word Count: 4250

26

27  
28  
29  
30  
31  
32  
33  
34  
35  
36  
37  
38  
39  
40

## Abstract

Families comprising many individuals with Autism Spectrum Disorder (ASD) may carry a dominant predisposing mutation. Our aim was to use rigorous phenotyping of the ‘Broader Autism Phenotype’ (BAP) in large multiplex ASD families to identify endophenotypes of the BAP for future genetic studies. We evaluated ASD/BAP features using standardised tests and a semi-structured interview to assess social, intellectual, executive and adaptive functioning in 109 individuals, including two large multiplex families (Family A: 30; Family B: 34) and an independent sample of small families ( $n=45$ ). Our protocol identified four psychological endophenotypes of the BAP that were evident in both samples, and showed high sensitivity (97%) and specificity (82%) for individuals classified with the BAP. The patterns of inheritance of these endophenotypes varied in the two large families, supporting their utility for identifying genes in autism.

**Keywords:** Broader autism phenotype, genetic, autism spectrum disorder, multiplex family

41 Autism Spectrum Disorder (ASD) is a neurodevelopmental condition that spans deficits in two  
42 domains: social communication, and restricted interests or repetitive behaviours APA 2013.  
43 Recent estimates from the Center for Disease Control and Prevention indicate prevalence of  
44 ASD is one in 68 children aged 8 years<sup>1</sup> making ASD a critical international health problem.  
45 Clinical and molecular research provides evidence for a genetic aetiology in ASD, yet despite  
46 recent molecular advances the cause remains unidentified in the majority of cases.

47 Improved understanding of ASD has facilitated recognition of milder phenotypes. Early  
48 clinical research identified autistic traits in relatives of children with ASD, described as the  
49 ‘broader autism phenotype’ (BAP)<sup>2,3</sup>. The BAP sits at the mildest end of the ASD spectrum and  
50 includes a range of subtle behavioural and cognitive features that reflect the two core domains of  
51 ASD. The *Diagnostic and Statistical Manual of Psychiatric Disorders –V* (DSM-V) stipulates  
52 that a significant degree of impairment must be present to qualify for a diagnosis of ASD<sup>4</sup>,  
53 whereas BAP traits lie on a continuum of normal population behaviours<sup>5</sup>. Monozygotic twins  
54 demonstrate 30% concordance for ASD<sup>6</sup>, increasing to 92% if the BAP is considered, while  
55 dizygotic twin concordance is ~10%<sup>7</sup>. Prevalence of the BAP in the general population is  
56 unknown, whereas several studies have demonstrated higher rates of BAP traits (20-50%) among  
57 relatives of children with ASD compared to controls, particularly in the areas of pragmatic  
58 language<sup>8,9</sup>, personality<sup>10</sup>, social cognition<sup>9,11,12</sup> and executive function<sup>13,14</sup>. Together these  
59 findings support the notion of complex inheritance of ASD.

60 The overall diagnostic rate of ASD is now >30%, including monogenic and chromosomal  
61 aetiologies<sup>15,16</sup>. The remaining ~70% are likely to have a genetic basis, with polygenic  
62 architecture in some, and unique *de novo* mutations in others<sup>17</sup>. Complementary techniques will  
63 be necessary to unravel aetiology in unsolved cases. Typically, family studies combine many

64 small families (2-3 affected individuals), however, these are likely to be confounded by genetic  
65 heterogeneity. Very large multiplex families (> 8 affected) where ASD traits appear dominantly  
66 inherited are rare, but more genetically homogeneous. In other complex disorders, such as  
67 epilepsy, phenotypic characterisation of such families has proved powerful in gene discovery<sup>18</sup>,  
68 however this approach has received limited attention in ASD<sup>18,19</sup>. In multiplex ASD families, the  
69 identification of family members with BAP traits, or endophenotypes, may serve as markers of  
70 carrier status<sup>19,20</sup>. In turn, this may facilitate gene identification<sup>21</sup>.

71 Endophenotypes are measurable features within a disorder that are proposed to reduce its  
72 complexity into more quantifiable elements<sup>22</sup>. They have been hypothesised to reflect more  
73 aetiologically homogeneous subgroups within genetically heterogeneous conditions. There are  
74 several BAP traits that may be considered “endophenotypes” from within the domains of  
75 language, executive function, and social cognition<sup>21</sup>. In the context of a single large family where  
76 numerous individuals demonstrate ASD or the BAP, recognition of BAP endophenotypes should  
77 allow granular identification of an autism gene of dominant effect. This study is the first known  
78 to the authors to apply this approach in autism.

79 The aim of our study was to analyse autistic traits within large multiplex families to  
80 examine inheritance of ASD by identifying endophenotypes of the BAP. We achieved this aim  
81 using an iterative process, first rigorously phenotyping many members of large multiplex  
82 families to delineate the full range of BAP traits for potential endophenotypes. We then assessed  
83 these traits in a separate sample of 20 small families, each with at least one member with ASD,  
84 to independently validate the endophenotypes. We then applied these endophenotypes to two of  
85 our fully characterised large multiplex families (from step 1) to assess their utility for examining  
86 inheritance patterns. We hypothesised that (1) multiple individuals in large families would

87 demonstrate the BAP, (2) specific BAP endophenotypes would be identifiable across the  
88 traditional BAP domains, and (3) these endophenotypes would vary in presentation between  
89 large multiplex families.

## 90 **Methods**

### 91 *Large Multiplex Families*

92 Large multiplex families were primarily ascertained from the Barwon Autism Database as part of  
93 a broader Collaborative Autism Study<sup>23</sup>. For inclusion as a multiplex family, > 8 individuals with  
94 a diagnosis or suspected diagnosis of ASD or the BAP were required. The two fully  
95 characterised large multiplex families used to examine inheritance patterns using BAP  
96 endophenotypes are referred to as ‘Family A’, ascertained from the Barwon Autism Database,  
97 and ‘Family B’, who was self-referred. All available relatives were recruited, including those  
98 with and without reported BAP traits. Informed consent was obtained from all participants or a  
99 parent/guardian, following approval of the study by the Human Research Ethics Committees of  
100 Barwon Health and the Royal Children’s Hospital, Melbourne.

### 101 **(Figure 1)**

#### 102 *Protocol for Diagnosing ASD in Large Multiplex Families*

103 ASD diagnoses were confirmed using the Autism Diagnostic Observation Schedule-Generic<sup>24</sup>  
104 (ADOS-G), the Autism Diagnostic Interview-Revised<sup>25</sup> (ADI-R), or DSM-IV-TR criteria<sup>26</sup>. For  
105 adults, the structured Family History Interview<sup>2</sup> (FHI) was administered by NJB, while for  
106 adolescents, a detailed developmental and medical history was obtained. Quantitative measures  
107 of intellect, executive functions, adaptive behaviour and social functioning were also completed  
108 (Table 1). Testing was undertaken over a number of days to minimise fatigue effects. A physical

109 examination was conducted for dysmorphic and neurocutaneous features and growth parameters.  
 110 Standard genetic testing (karyotype, fragile X testing) and metabolic investigations were  
 111 performed on probands.

112 Across Family A and B, 65 individuals were recruited: 16 children (2 -12 years), 9  
 113 adolescents (13-17 years) and 40 adults (18-79 years) spanning 4 generations. Of these, 16/65  
 114 met criteria for a diagnosis of ASD. Family B also reported a deceased family member who had  
 115 a diagnosis of ASD (generation V) and an additional family member with ASD (generation 4)  
 116 who was not recruited. Scrambled pedigrees of affected status are presented to preserve  
 117 participant anonymity (Fig.1). In each family, a matriarch was identified. Individuals directly  
 118 related to each matriarch are classified as ‘core family’; others are referred to as ‘married-in’.  
 119 Family A comprised 30 individuals, including 7 diagnosed with ASD (6/9 children, 1/6 adults;  
 120 Fig.1a). Nineteen were core family; 11 were married-in. In Family B, we fully phenotyped 35  
 121 individuals, not including the matriarch (who was not assessed). Three children and three  
 122 adolescents participated in a limited range of phenotyping activities and as such, these  
 123 individuals were excluded from final analyses. Nine had ASD (5/7 children, 1/5 adolescents,  
 124 3/22 adults; Fig.1b); 31 were core family, and four were married-in.

| Protocol Item                                                        | Participants with ASD            |                | Participants without ASD |                        |                |
|----------------------------------------------------------------------|----------------------------------|----------------|--------------------------|------------------------|----------------|
|                                                                      | Child or Adolescent<br>≥4.5-17yr | Adult<br>≥18yr | Child<br><13yr           | Adolescent<br>≥13–17yr | Adult<br>≥18yr |
| ADI-R + ADOS-G <i>or</i> DSM-IV interview + ADOS-G                   | +                                | ±              | -                        | -                      | -              |
| Detailed developmental, medical, psychiatric and behavioural history | +                                | +              | +                        | +                      | +              |
| Family History Interview                                             | -                                | +              | -                        | -                      | ±              |

|                                                                                                |   |   |   |   |   |
|------------------------------------------------------------------------------------------------|---|---|---|---|---|
| Standardised testing of cognition and executive function <sup>a</sup>                          | ± | + | + | + | ± |
| Questionnaires of adaptive behaviour <sup>b</sup>                                              | + | + | + | + | ± |
| Broader Autism Phenotype Interview, the Faux Pas Task, Cartoon Task and Pragmatic Rating Scale | - | ± | - | + | + |
| Physical Examination                                                                           | + | + | + | + | + |
| High resolution molecular karyotype, Fragile X testing, metabolic investigations               | + | - | - | - | - |

*ASD* Autism Spectrum Disorder, *ADI-R* Autism Diagnostic Interview-Revised, *ADOS-G* Autism Diagnostic Observation Schedule-Generic, *DSM-IV* Diagnostic and Statistical Manual of Mental Disorders (4th edition).

+ all individuals completed this assessment; - no individuals completed this assessment; ± only some individuals completed this assessment

<sup>a</sup>Wechsler Abbreviated Scale of Intelligence and subtests of the Delis-Kaplan Executive Function System

<sup>b</sup>The Adaptive Behavioural Assessment System (2nd edition) and The Behavioural Rating Inventory of Executive Function

125 **Table 1. Protocol for diagnosing ASD and phenotyping the BAP in large multiplex families**

126

127 *Protocol for Phenotyping the BAP in Large Multiplex Families*

128 We employed a mixed methods approach to rigorously assess the BAP, including an evaluation

129 of general intellect, executive functions, adaptive behaviour, social cognition and language

130 pragmatics (Table 1). A purpose developed semi-structured interview, the Broader Autism

131 Phenotype Interview (BAPI), was also administered by three clinicians with expertise in

132 neurobehavioural disorders (NJB, SJW, IES) to all individuals ≥13 years, to determine the

133 presence, nature and extent of BAP features. Questions focused on the participant’s life story,

134 personal qualities, relationships, social functioning, and developmental, medical, psychiatric and

135 vocational history. During the interview we included one or two “intentional errors” to elicit

136 pragmatic elements of the BAP, such as terse speech<sup>9</sup>.

137 Full scale (FSIQ), verbal (VIQ) and performance (PIQ) intelligence quotients were  
138 derived with the four subtest Weschler Abbreviated Scale of Intelligence<sup>27</sup> (WASI;  $M=100$ ,  
139  $SD=15$ ). Executive functions were measured with seven subtests of the Delis-Kaplan Executive  
140 Function System<sup>28</sup> (D-KEFS;  $M=10$ ,  $SD=3$ ). The second edition of the Adaptive Behavioural  
141 Assessment System<sup>29</sup> (ABAS-II) and the Behavioural Rating Inventory of Executive Function<sup>30</sup>  
142 (BRIEF) were used to assess adaptive functioning (Table 1).

143 Social discourse was assessed using an adapted Faux Pas Task<sup>31,32</sup> (FPT). The task  
144 included four faux pas stories and four control stories<sup>33</sup> (maximum score=40,  $M=37$ ,  $SD=4$ ). In  
145 addition, the Goldman-Eisler Cartoon task<sup>34</sup> was used to explore previous observations of overly  
146 detailed speech and longer pauses between words in the BAP<sup>9</sup>. This task measures discourse  
147 production by eliciting a description of an eight frame captionless cartoon, “The Cowboy Story”,  
148 over three successive trials<sup>35</sup>. Control individuals show increased verbal fluency with successive  
149 trials compared with decreased fluency in individuals with communication deficits<sup>34</sup>. Following  
150 all assessments, the Pragmatic Rating Scale (PRS) was independently completed by the three  
151 interviewers and consensus ratings reached. A score  $\geq 4$  defined pragmatic impairment<sup>10</sup>. After  
152 independent review of all qualitative and quantitative data by NJB, SJW, and IES the presence of  
153 the BAP was determined by consensus.

#### 154 ***Small Families***

155 We recruited an independent sample of 45 individuals from 20 small families with at least one  
156 member diagnosed with ASD, via advertisements and from the Barwon Autism Database. All  
157 participants provided written informed consent, as described above. Inclusion criteria were: (i)  
158 no diagnosis of ASD (based on DSM-IV or DSM-V criteria), (ii)  $\geq 1$  family member with ASD  
159 (based on DSM-IV or DSM-V criteria), and (iii)  $>12$  years of age. Individuals were classified as



160 having the BAP if they met  $\geq 2$  criteria for a BAP diagnosis on the Broader Autism Phenotype  
161 Rating Scale<sup>2</sup> (BAPRS). Individuals were classified as unaffected if they did not meet criteria for  
162 any BAP traits or a diagnosis of ASD. This identified 30 individuals with the BAP (4  
163 adolescents, 26 adults) in the 20 families, ranging in age from 14-71 years, and 11 unaffected  
164 adult family members ranging in age from 18-53 years. Four adult individuals showed only one  
165 BAP trait on the BAPRS and thus, were excluded from analyses based on the above criteria.

166 In 27 individuals, average total scores were available for the Broader Autism Phenotype  
167 Questionnaire (BAPQ), and in 31 individuals, FSIQ, Verbal Comprehension (VCI) and  
168 Perceptual Reasoning (PRI) indices had been derived with the WASI-II<sup>36</sup> ( $M=100$ ,  $SD=15$ ). As  
169 shown in Table 2, all individuals were within the normal range based on FSIQ, with no  
170 significant differences between unaffected and BAP individuals for age or intellect (all  $p < .250$ ).  
171 Consistent with expectations, there was a trend for higher scores on the BAPQ in the BAP group,  
172 with a medium effect size ( $t(24.56) = -1.96$ ,  $p = .062$ ,  $d = 0.70$ ).

|                                 | Unaffected    | BAP           |
|---------------------------------|---------------|---------------|
| Number of participants (female) | 11 (6)        | 30 (19)       |
| Mean age (range)                | 41.09 (18-53) | 39.50 (14-53) |
| Mean BAPQ (SD)*                 | 2.43 (0.38)   | 2.92 (0.92)   |
| Mean FSIQ (SD)**                | 108 (14)      | 111 (13)      |
| Mean VCI (SD)**                 | 106 (18)      | 109 (15)      |
| Mean PCI (SD)**                 | 109 (7)       | 110 (15)      |

\*data available for unaffected ( $n=9$ ) and BAP ( $n=18$ ); \*\* data available for unaffected ( $n=10$ ) and BAP ( $n=21$ ). BAPQ=Broader Autism Phenotype Questionnaire; FSIQ=Full Scale Intelligence Quotient; VCI=Verbal Comprehension Index; PRI=Perceptual Reasoning Index

173 **Table 2. Demographics of the small families sample**

174 ***Procedure***

175 We used an iterative process to characterise, refine and assess endophenotypes of the BAP in our  
176 two separate samples, as summarised in Fig.2.

177 *Step 1: Identification of Potential BAP Endophenotypes in Large Multiplex Families*

178 Using a grounded theory approach, BAP traits were initially identified from a detailed literature  
179 review targeting the theoretical domains described in the seminal work of Bolton (1994), on  
180 which the conceptualisation of the BAP is largely based. The domains included speech, literacy,  
181 pragmatics, relationships, and circumscribed interests, which were explored in-depth using our  
182 BAP phenotyping protocol (described above) in members of unrelated large multiplex families  
183 primarily ascertained through the Collaborative Autism Study<sup>33</sup>. This in-depth characterisation  
184 was phenomenologically based<sup>37</sup>, whereby the number of traits within each domain was fully  
185 expanded through administration of the semi-structured interview (BAPI) with separate family  
186 members until no further traits were identified (saturation) to capture the entire range of BAP  
187 traits (Table 3).

188 **(Figure 2)**

189 Initial phenotyping produced an exhaustive list of 36 BAP traits. Ordinal ratings of these  
190 traits were then assigned to capture subtle variations in their presentation, with severity rated on  
191 a scale of 0=absent, 1=mild, 2=moderate, and 3=severe. The presence of traits through each  
192 individual's developmental history was also evaluated where available. Exploratory hierarchical  
193 cluster analysis was then performed to identify potential BAP endophenotypes. We used Ward's  
194 method with Euclidean squared distances based on z-scores to progressively group traits by  
195 minimising the variability within clusters and maximising the variance between clusters<sup>38</sup>.

196 Interpretation of cluster groupings was informed by the relative similarity and dissimilarity in the  
197 linkage output combined with clinical judgement, leading to the initial identification of five  
198 endophenotypes. Inspection of these endophenotypes revealed a consistent rating of 0 for two of  
199 the 36 traits across all interviews, leading to their removal. One further trait reflecting  
200 inflexibility to intentional errors was removed due to challenges reliably assessing it across  
201 interviewers, resulting in a final set of 33 BAP traits (Table 3).

202 *Step 2: Validation of BAP Endophenotypes in Small Families*

203 In the small families sample, an independent expert in ASD assessment (CG) interviewed and  
204 rated 45 participants on the 33 BAP traits based on all qualitative and quantitative data, with a  
205 subset (9%) rated via consensus between CG, IES and SJW to ensure consistency in ratings  
206 across both samples and to clarify borderline cases. As above, Ward's hierarchical cluster  
207 analysis was used to examine natural trait groupings. This led to the identification of four  
208 endophenotypes that showed a high degree of similarity to the initial five cluster solution.

209 To account for a variable number of traits in each cluster we computed proportional  
210 scores, whereby scores on each trait (range 0-3) were summed and divided by the maximum total  
211 score for that cluster, to produce four cluster scores for each individual. An ROC curve was  
212 plotted for each cluster in the small families sample to identify optimum cut-off scores for  
213 determining endophenotypic status using Youden's Index to allow mildly affected individuals to  
214 be included<sup>39,40</sup>. The highest score was used to represent the most prominent endophenotype for  
215 each individual, calculated as the difference between the observed endophenotype (i.e., cluster)  
216 score and the threshold score for the endophenotype (i.e., cut-off score).

217

218

| <b>BAP domains</b>                                     | <b>Expanded traits</b>                                                                                                                                                                                                                                                                                                                                                                                                                                                                                                                                                                                                                                                                                                                                                                                                                |
|--------------------------------------------------------|---------------------------------------------------------------------------------------------------------------------------------------------------------------------------------------------------------------------------------------------------------------------------------------------------------------------------------------------------------------------------------------------------------------------------------------------------------------------------------------------------------------------------------------------------------------------------------------------------------------------------------------------------------------------------------------------------------------------------------------------------------------------------------------------------------------------------------------|
| Communication<br>(speech and literacy)                 | Reduced capacity for clear narrative<br>Difficulty answering open ended questions<br>Reduced quantity of verbal output<br>Speech has little variation in tone (i.e. monotonous)<br>Unusual speech volume<br>Precise articulation and language<br>Use of an accent*                                                                                                                                                                                                                                                                                                                                                                                                                                                                                                                                                                    |
| Social communication<br>(pragmatics and relationships) | An unusual or awkward greeting style<br>A limited capacity to develop rapport with assessors<br>Unusual eye gaze<br>Awkward social interactions<br>Making inappropriate or awkward comments either on history or during assessments<br>Tangential pragmatic style<br>Terse pragmatic style<br>Tendency to monologue rather than participate in reciprocal conversation<br>Opinionated in conversation<br>Overly technical language<br>Little appreciation of humour (during the Cartoon task)<br>Inflexible to intentional errors*<br>Tendency to anger easily<br>Narcissistic personality style<br>Self perception incongruent with views of others<br>Aloof personality style<br>Difficult or limited interpersonal relationships<br>Reduced affection<br>Reduced emotional empathy<br>Reduced cognitive empathy<br>Excessive worry |
| Circumscribed interests                                | Preference for structure in activities of daily living<br>Fastidious regarding personal appearance<br>Fastidious cleaning<br>Hobby or interest of unusual intensity, or restricted range of interests relative to peers<br>Large collections or hoarding of items<br>Focus on technicalities or minutiae<br>Recurrent thoughts (distressing)*<br>Recurrent thoughts (not distressing)                                                                                                                                                                                                                                                                                                                                                                                                                                                 |

\*BAP trait was removed from the final list (see text for details).

219 **Table 3. Identification of BAP traits through expansion of the BAP domains**

220

221 *Step 3: Assessment of BAP Endophenotypes in Family A and B*

222 A team member who had not been involved in the phenotyping of Family A and B (Step  
223 1) performed the endophenotype analysis (KT). Proportional scores for the four endophenotypes  
224 were calculated, and family members classified as having the endophenotype if their  
225 proportional score was greater than or equal to the cut-off scores identified in the small families  
226 analysis (step 2). As above, the highest score (observed endophenotype score – threshold  
227 endophenotype score) for any endophenotype was used to represent an individual’s most  
228 prominent endophenotype. A discriminant function analysis was then used to determine the  
229 sensitivity and specificity of the endophenotype approach to identifying the presence of the BAP  
230 in these families. In addition, endophenotype results were correlated with measures of intellect,  
231 executive, social and adaptive functions using conservative non-parametric Spearman’s  
232 correlations ( $r_s$ ).

233 **Results**

234 *Hypothesis 1: Multiple individuals in large families demonstrate the BAP*

235 Based on our rigorous protocol for phenotyping the BAP in large multiplex families, we  
236 identified 32 members with the BAP across Family A and B. Of the 23 members in Family A  
237 who did not have an ASD diagnosis, we detected the BAP in 17 (74%) individuals, with 6  
238 individuals unaffected. In Family B, we detected 15 (63%) individuals with the BAP, with 9  
239 individuals unaffected (Table 4).

240 Intellectual function was directly assessed in 54/63 (86%) individuals. Overall,  
241 participants were of average or greater intelligence. Average FSIQ was observed in 32/54 (59%)  
242 of individuals, while 20/54 (37%) demonstrated superior or very superior FSIQ (Table 4). We  
243 performed group-level comparisons of cognitive, social and adaptive functions between family

244 members with and without the BAP using non-parametric and parametric tests (Mann-Whitney  
245 U and t-tests respectively), with the more conservative parametric tests reported here as there  
246 were no differences between these approaches. On average, individuals with the BAP  
247 demonstrated poorer pragmatic language, with significantly higher mean PRS scores ( $M=8.75$ ,  
248  $SD=7.08$ ) compared to unaffected individuals ( $M=2.00$ ,  $SD=3.05$ ),  $t(40.99)=-4.42$ ,  $p<0.001$ . No  
249 significant differences were observed for general intellect (FSIQ, VIQ, PIQ), the FPT, executive  
250 (D-KEFS) or adaptive function measures (ABAS-II, BRIEF).

251 ***Hypothesis 2: Specific BAP endophenotypes exist across BAP domains***

252 Based on our iterative characterisation process, four distinct endophenotypes of the BAP were  
253 reliably identified. Based on the natural grouping of traits, these reflected ‘socially unaware’,  
254 ‘pedantic’, ‘aloof’, and ‘obsessive’ endophenotypes (Table 5). At the highest level of the  
255 dendrogram of the 33 BAP traits there was a clear split, whereby traits of the socially unaware  
256 and pedantic endophenotypes were more similar to each other and more dissimilar to the  
257 combination of traits of the aloof and obsessive endophenotypes. There was a significant  
258 difference between the mean proportional scores of the unaffected and BAP groups, with the  
259 BAP group demonstrating significantly higher scores on all four endophenotypes (all  $p>0.015$ ).

260 Analysis of ROC curves indicated relatively good discrimination within the small  
261 families for the socially unaware, aloof and obsessive endophenotypes (all  $AUC > 0.73$ , all  
262  $p<.025$ ), and acceptable discrimination for the pedantic endophenotype ( $AUC=0.68$ ,  $p=0.077$ ).  
263 Although we note that Box’s M was violated in the discriminant function analysis (likely due to  
264 variation in the sample sizes), combined, the four endophenotypes captured 93% of cases  
265 (Wilk’s  $\lambda=0.47$ ,  $\chi^2=27.83$ ,  $p<.001$ ). In particular, the endophenotypes showed high sensitivity

266 for the BAP group (97%), characterised by higher proportional scores, and good specificity for  
 267 the unaffected group (82%), with lower proportional scores (Table 5).

268

|                 | Number of participants (female) | Mean age (range) | Cognitive data ( <i>n</i> ) | FSIQ Mean (SD) | VIQ Mean (SD) | PIQ Mean (SD) |
|-----------------|---------------------------------|------------------|-----------------------------|----------------|---------------|---------------|
| <b>Family A</b> |                                 |                  |                             |                |               |               |
| ASD             | 7 (1)                           | 11.43 (4 – 34)   | 5                           | 107 (16)       | 97 (15)       | 101 (30)      |
| Unaffected      | 6 (5)                           | 25.83 (2 – 50)   | 5                           | 127 (17)       | 130 (17)      | 117 (15)      |
| BAP             | 17 (8)                          | 49.18 (13 – 79)  | 16 <sup>c</sup>             | 119 (13)       | 117 (13)      | 115 (12)      |
| Total           | 30 (14)                         | 35.7 (2 – 79)    | 26                          | 118 (15)       | 116 (17)      | 113 (18)      |
| <b>Family B</b> |                                 |                  |                             |                |               |               |
| ASD             | 9 (3)                           | 15.00 (8 – 20)   | 5                           | 95 (20)        | 89 (28)       | 105 (16)      |
| Unaffected      | 9 (7)                           | 37.33 (10 – 73)  | 9                           | 110 (14)       | 111 (14)      | 108 (11)      |
| BAP             | 15 (10)                         | 47.40 (15 – 73)  | 15                          | 102 (17)       | 105 (18)      | 99 (17)       |
| Total           | 33 (20)                         | 35.06 (6 – 73)   | 29                          | 103 (17)       | 104 (19)      | 102 (15)      |
| Both families   | 63 (34)                         | 35.37 (2 – 79)   | 55 <sup>c</sup>             | 110 (18)       | 110 (19)      | 107 (17)      |

269 *Note.* Average FSIQ = 80-119; Superior FSIQ =  $\geq 120$

270 <sup>a</sup>One individual only completed VIQ and select executive functioning subtests

271 **Table 4. Intellectual functioning in Family A and B by diagnostic classification**

272

273

274

275

| Mean Proportional Score (SD)                                                          |                | Cut-off score | BAP traits <sup>1</sup>                                                                                                                                                                                                                                                                                                                                                                                                                                                                                                                            |
|---------------------------------------------------------------------------------------|----------------|---------------|----------------------------------------------------------------------------------------------------------------------------------------------------------------------------------------------------------------------------------------------------------------------------------------------------------------------------------------------------------------------------------------------------------------------------------------------------------------------------------------------------------------------------------------------------|
| Unaffected (n=11)                                                                     | BAP (n=30)     |               |                                                                                                                                                                                                                                                                                                                                                                                                                                                                                                                                                    |
| <b>‘Socially unaware’: Poor self-regulation and reciprocity in conversation</b>       |                |               |                                                                                                                                                                                                                                                                                                                                                                                                                                                                                                                                                    |
| 0.69 (0.06)                                                                           | 0.20 (0.18)**  | >0.17         | <ul style="list-style-type: none"> <li>• Reduced capacity for clear narrative</li> <li>• Difficulty answering open ended questions</li> <li>• Making inappropriate or awkward comments either on history or during assessments</li> <li>• Tangential pragmatic style</li> <li>• Tendency to monologue rather than participate in reciprocal conversation</li> <li>• Tendency to anger easily</li> <li>• Reduced quantity of verbal output</li> </ul>                                                                                               |
| <b>‘Pedantic’: Self-focused and technical in interactions</b>                         |                |               |                                                                                                                                                                                                                                                                                                                                                                                                                                                                                                                                                    |
| 0.04 (0.05)                                                                           | 0.11 (0.12)*   | >0.14         | <ul style="list-style-type: none"> <li>• An unusual or awkward greeting style</li> <li>• Unusual eye gaze</li> <li>• Speech has little variation in tone (i.e. monotonous)</li> <li>• Unusual speech volume</li> <li>• Precise articulation and language</li> <li>• Terse pragmatic style</li> <li>• Overly technical language</li> <li>• Narcissistic personality style</li> <li>• Focus on technicalities or minutiae</li> <li>• Fastidious regarding personal appearance</li> <li>• Self perception incongruent with views of others</li> </ul> |
| <b>‘Aloof’: Difficulties relating to other’s emotions and expressing own emotions</b> |                |               |                                                                                                                                                                                                                                                                                                                                                                                                                                                                                                                                                    |
| 0.12 (0.07)                                                                           | 0.31 (0.16)*** | >0.20         | <ul style="list-style-type: none"> <li>• Aloof personality style</li> <li>• Difficult or limited interpersonal relationships</li> <li>• Reduced emotional empathy</li> <li>• A limited capacity to develop rapport with assessors</li> <li>• Reduced affection</li> <li>• Awkward social interactions</li> <li>• Opinionated in conversation</li> <li>• Reduced cognitive empathy</li> <li>• Little appreciation of humour (during the Cartoon task)</li> </ul>                                                                                    |
| <b>‘Obsessive’: Regimented approach to life and tendency to ruminate</b>              |                |               |                                                                                                                                                                                                                                                                                                                                                                                                                                                                                                                                                    |
| 0.13 (0.10)                                                                           | 0.27 (0.18)*** | >0.25         | <ul style="list-style-type: none"> <li>• Hobby or interest of unusual intensity, or restricted range of interests relative to peers</li> <li>• Large collections or hoarding of items</li> <li>• Fastidious cleaning</li> <li>• Preference for structure in activities of daily living</li> <li>• Recurrent thoughts that are not distressing</li> <li>• Excessive worry</li> </ul>                                                                                                                                                                |

\* $p < .05$ , \*\* $p < .01$ , \*\*\* $p < .001$



277 ***Hypothesis 3: BAP endophenotypes vary in large multiplex families***

278 Applying the above endophenotype thresholds to the proportional scores of the 33 BAP traits for  
279 members of Family A and B led to the identification of all individuals classified as having the  
280 BAP. Two additional BAP cases were identified in Family B based on the presence of above  
281 threshold endophenotype scores, indicating good utility of this approach (Fig.3). One individual  
282 was excluded from this analysis due to incomplete data (III-7). Across both families, the aloof  
283 endophenotype was most commonly observed (62%), followed by obsessive (60%), pedantic  
284 (55%) and socially unaware (48%). Approximately one quarter of family members met criteria  
285 for only one endophenotype, 15% met criteria for two, and the remainder met criteria for 3-4  
286 (62%) (Fig.3). The dominant endophenotype across both families, as determined by the highest  
287 score, was aloof (47%), followed by obsessive (26%), socially unaware (18%) and pedantic  
288 (9%).

289 Family A appeared to have two endophenotype profiles, with one characterised by the  
290 presence of a single endophenotype (35%) seen in individuals who were mostly married-in  
291 (67%), contrasting with the second profile (41%) of all four endophenotypes, most evident in  
292 core family members (72%) (Fig.4). Overall, the obsessive endophenotype occurred most  
293 frequently (77%), followed equally by pedantic (65%) and aloof (65%), and then socially  
294 unaware (53%). The co-occurrence of the obsessive and pedantic endophenotypes was relatively  
295 common, seen in 29% of married-ins and core family members. Overall, there was a range of  
296 dominant endophenotypes across individuals, with aloof the most frequent (35%) particularly in  
297 core family members (83%).

298 Contrasting with Family A, Family B had more individuals (70%) with multiple  
299 endophenotypes, in both married-in and core family members (Fig.4). All four endophenotypes

300 were again most frequently observed in core family members, indicative of a more severe BAP  
301 presentation. Unlike Family A, however, the aloof endophenotype occurred most frequently in  
302 Family B (88%), followed by obsessive (71%), pedantic (65%), and socially unaware (65%).  
303 The aloof endophenotype was also identified as dominant (59%), evident in 70% of core family  
304 members.

305 **(figure 3)**

306 **(figure 4)**

### 307 *Correlates of the BAP Endophenotypes*

308 Across both families, no sex or age differences were observed for any of the  
309 endophenotypes (all  $p < .200$ ). Overall, a more severe BAP presentation (indicated by a greater  
310 number of endophenotypes) was associated with reduced social adaptive functioning on both  
311 self-report and objective measures of social communication (Table 6). In particular, a more  
312 severe BAP presentation showed a strong correlation with more severe pragmatic language  
313 difficulties, with scores for each endophenotype also significantly correlated. A similar  
314 relationship was evident for the ability to detect a faux pas in social discourse and self-reported  
315 social functioning, particularly for family members with the socially unaware endophenotype  
316 (Table 6).

317

318

319

| Domain | Task | Endophenotypes   |          |        |           | Total number |
|--------|------|------------------|----------|--------|-----------|--------------|
|        |      | Socially unaware | Pedantic | Aloof  | Obsessive |              |
| Social | PRS  | 0.83**           | 0.73**   | 0.76** | 0.45**    | 0.86**       |

|                     |                                         |         |       |        |        |         |
|---------------------|-----------------------------------------|---------|-------|--------|--------|---------|
| communication       | FPT                                     | -0.43** | -0.28 | -0.24  | -0.18  | -0.40** |
| Intellect           | FSIQ                                    | -0.36*  | -0.10 | -0.31* | -0.02  | -0.28   |
|                     | VIQ                                     | -0.29   | -0.05 | -0.31* | -0.03  | -0.28   |
|                     | PIQ                                     | -0.36*  | -0.13 | -0.19  | -0.02  | -0.26   |
| Executive functions | Trails (numbers) <sup>a</sup>           | -0.32*  | -0.20 | -0.29  | 0.17   | -0.19   |
|                     | Trails (switch) <sup>a</sup>            | -0.24   | -0.23 | -0.27  | -0.22  | -0.34*  |
|                     | Design fluency (switch) <sup>a</sup>    | -0.27   | -0.25 | -0.15  | -0.09  | -0.34*  |
|                     | Design fluency (composite) <sup>a</sup> | -0.27   | -0.25 | -0.25  | -0.03  | -0.32*  |
|                     | Tower task (achievement) <sup>a</sup>   | -0.40** | -0.19 | -0.27  | -0.22  | -0.26   |
|                     | Sorting (confirmed)                     | -0.33*  | -0.23 | -0.32* | -0.22  | -0.33*  |
|                     | Sorting (free sort)                     | -0.31   | -0.15 | -0.24  | -0.37* | -0.37*  |
| Adaptive function   | Social index (self-report)              | -0.46*  | -0.35 | -0.19  | -0.31  | -0.43*  |

\* $p < .05$ ; \*\* $p < .01$

<sup>a</sup>nonverbal executive function subtests; PRS= Pragmatic Rating Scale; FPT=Faux Pas Test; FSIQ=Full Scale Intelligence Quotient; VIQ = Verbal Intelligence Quotient; PIQ = Performance Intelligence Quotient

320 **Table 6. Correlations between endophenotypes and quantitative measures in Family A and**  
 321 **B**

322 For the cognitive measures, a more severe BAP presentation was associated with reduced  
 323 executive functioning, particularly for nonverbal measures of cognitive flexibility (switching and  
 324 fluency; Table 6). A pattern of weaker correlations was also evident for specific endophenotypes,  
 325 including lower IQ in the socially unaware and aloof endophenotypes (Table 6).

326 **Discussion**

327 We studied the BAP to highlight the phenotypic variation within and between high-risk ASD  
 328 families, to improve identification of individuals crucial for accurate molecular genetic analysis.  
 329 We identified multiple individuals with the BAP in large multiplex families using rigorous  
 330 phenotyping and a new endophenotyping approach, which was validated in an independent  
 331 sample of small ASD families. The results of this work show that specific BAP endophenotypes  
 332 exist across the traditional BAP domains of social relationships, communication, and

333 circumscribed interests and behaviour, providing a more nuanced way to detect subtle features of  
334 the BAP. Moreover, these endophenotypes show different patterns of inheritance in two large  
335 multiplex families, supporting their use to identify autism genes of dominant effect.

336         Despite major advances in ASD genetics, aetiology in the majority of cases remains  
337 unknown. The research model employed here to phenotype rare large multiplex families reveals  
338 a pattern consistent with autosomal dominant inheritance of ASD/BAP traits that would not have  
339 been captured without such rigorous phenotyping. Fifteen individuals (23%) met criteria for  
340 ASD and 33 (51%) the BAP, including some married-in individuals. Our promising  
341 endophenotype analysis provides further insight into specific profiles of the BAP and its varied  
342 presentation. Traditionally, ASD family studies include 2-3 affected individuals<sup>41,42</sup>. For  
343 example, four candidate ASD genes were identified in seven ASD/BAP pedigrees with  $\geq 3$   
344 affected individuals<sup>43</sup>. Larger multiplex families remain scarce in the literature<sup>20,44</sup>. Here, we  
345 identified more subtle indicators of carrier status in two large families, using a robust  
346 endophenotyping method with good sensitivity and specificity to detect the BAP in two  
347 independent samples.

### 348 ***Endophenotypes of the BAP***

349 Over the last 20 years, the BAP has emerged as strongly associated with ASD. The BAP is  
350 considered a marker of carrier status of genes that may contribute to autism risk<sup>21,45</sup>. Here we  
351 aimed to dissect the BAP into endophenotypes to understand the phenotypic variation within and  
352 between families. Importantly, each endophenotype cluster was characterised by a combination  
353 of communication, personality and behavioural indicators showing how specific traits across the  
354 traditional BAP domains may group together to form distinct endophenotypes or ‘profiles’. As  
355 summarised in Table 7, these profiles capture identifiable ‘personas’ that have core

356 characteristics with high face validity. These profiles also vary with functional correlates in  
 357 distinct ways, supporting their construct validity. For example, the aloof endophenotype was  
 358 characterised by a lack of innate social motivation or ability to meaningfully connect and  
 359 empathise with others, associated with decreased theory of mind, lower executive and  
 360 intellectual functioning. One individual dominant for the aloof endophenotype described social  
 361 interactions as “a means to an end”. In contrast, the pedantic endophenotype was primarily  
 362 characterised by detail-oriented traits, showing no associations with intellectual, executive or  
 363 adaptive functions. Unsurprisingly, given the importance of social communication deficits in  
 364 ASD and the BAP, all endophenotypes were associated with poor social communication, with  
 365 the socially unaware endophenotype most broadly affected across social, intellectual, executive  
 366 and adaptive function domains (Table 7).

| Endophenotype    | Core Characteristic                                      | Associated Functional Domains |           |           |          |
|------------------|----------------------------------------------------------|-------------------------------|-----------|-----------|----------|
|                  |                                                          | Social                        | Intellect | Executive | Adaptive |
| Socially unaware | Poor self-regulation and reciprocity in conversation     | ✓                             | ✓         | ✓         | ✓        |
| Pedantic         | Self-focused and technical in interactions               | ✓                             |           |           |          |
| Aloof            | Difficulties expressing and relating to other’s emotions | ✓                             | ✓         | ✓         |          |
| Obsessive        | Regimented approach to life and tendency to ruminate     | ✓                             |           | ✓         |          |

367 **Table 7. Summary of the BAP endophenotypes and their functional correlates**

368

369 By clustering traits across traditional BAP domains, endophenotype profiles may  
 370 improve detection of the BAP and thus, advance gene discovery. Specifically, in contrast with a  
 371 traditional domain approach, where an individual may show mild BAP features across all  
 372 domains but fail to meet criteria, an endophenotype approach allows individuals with autism

373 susceptibility genes to be captured by meeting threshold criteria for a specific profile.  
374 Importantly, replication and validation of the proposed BAP endophenotypes is needed, using  
375 targeted assessments to further validate and refine the traits characterising each endophenotype.  
376 This, in turn, will provide the foundation for more efficient assessment protocols, and more  
377 sophisticated and granular mapping of psychological and neural correlates where results have  
378 been mixed to date<sup>46</sup>.

379 ***Careful endophenotyping will enable genetic insights***

380 Consistent with previous literature, phenotypic heterogeneity was evident in both families at the  
381 endophenotype level suggesting a single familial mutation may produce a phenotypic spectrum,  
382 with other genetic, epigenetic and environmental factors influencing expression. With the  
383 advancement of high-throughput next generation sequencing technologies, meticulous  
384 phenotypic characterisation of both affected and apparently unaffected individuals remains  
385 essential for accurate data interpretation. In other words, identification of subtle endophenotypes,  
386 such as the four identified here, are crucial for advancing gene discovery programs.

387         Although multiplex families with ASD are genetically homogeneous, our phenotyping  
388 analysis suggests possible bi-linear inheritance of the BAP in both families. Therefore, multiple  
389 risk alleles may contribute to ASD/BAP in later generations, consistent with recent genetic and  
390 phenotyping evidence<sup>47,48</sup>. The importance of unique *de novo* genetic changes in both sporadic  
391 (or ‘simplex’), ASD<sup>17</sup>, and small multiplex ASD families<sup>44</sup> has become increasingly apparent.  
392 However, with at least seven individuals with ASD and many more with the BAP in our families,  
393 there is less likelihood of *de novo* changes contributing to each phenotype. It is much more likely  
394 that there is a single genetic variant of major phenotypic effect in each family, with the

395 possibility that there are additional *de novo* genetic changes in some individuals that contribute  
396 to phenotypic severity.

### 397 ***Limitations***

398 The intensive nature of the study meant that clinicians were not blinded to family relationships,  
399 potentially leading to investigator bias. However, our diagnostic method of consensus between  
400 experienced clinicians aligns with current best practice for ASD/BAP diagnosis and was  
401 informed by quantitative and qualitative measures. We selected a relatively low threshold for  
402 BAP classification, leading to the identification of many affected individuals. However, this  
403 approach is justified in a family with a clear genetic liability for ASD and was validated by the  
404 finding of consistent data-driven endophenotypes in the small families. Successful gene  
405 identification in future work requires capture of all individuals who may carry the putative  
406 variant, with the approach outlined here enabling more robust gene identification work.

### 407 **Conclusion**

408 Despite significant advances in unravelling the heterogeneity of ASD, in most cases, the  
409 underlying genetic aetiology remains unknown in part due to difficulties identifying  
410 endophenotypes and potential carriers. We used a rigorous phenotyping approach to characterise  
411 the BAP in two large multiplex families with dominant inheritance of ASD and the BAP. Further  
412 phenotypic delineation identified four endophenotypes, showing differentiation of BAP features  
413 beyond traditional domain approaches. This endophenotype approach advances our  
414 understanding of the phenotypic spectrum to improve detection of the BAP in research and  
415 clinical practice, facilitating gene discovery, neuroimaging investigations, and psychological  
416 studies.

417

## References

- 418 1 Christensen, D. L. *et al.* Prevalence and Characteristics of Autism Spectrum Disorder Among Children Aged  
419 8 Years--Autism and Developmental Disabilities Monitoring Network, 11 Sites, United States, 2012.  
420 *MMWR Surveill Summ* **65**, 1-23, doi:10.15585/mmwr.ss6503a1 (2016).
- 421 2 Bolton, P. *et al.* A case-control family history study of autism. *J Child Psychol Psychiatry* **35**, 877-900  
422 (1994).
- 423 3 Kanner, L. Autistic Disturbances of Affective Contact. *Nervous Child* **2**, 34 (1943).
- 424 4 American Psychiatric Association. *Diagnostic and Statistical Manual of Mental Disorders (5 ed.)*.  
425 (American Psychiatric Association, 2013).
- 426 5 Constantino, J. N. & Todd, R. D. Intergenerational transmission of subthreshold autistic traits in the  
427 general population. *Biol Psychiatry* **57**, 655-660, doi:10.1016/j.biopsych.2004.12.014 (2005).
- 428 6 Folstein, S. & Rutter, M. Genetic influences and infantile autism. *Nature* **265**, 726-728 (1977).
- 429 7 Bailey, A. *et al.* Autism as a strongly genetic disorder: evidence from a British twin study. *Psychol Med* **25**,  
430 63-77 (1995).
- 431 8 Piven, J., Palmer, P., Jacobi, D., Childress, D. & Arndt, S. Broader autism phenotype: evidence from a family  
432 history study of multiple-incidence autism families. *Am J Psychiatry* **154**, 185-190,  
433 doi:10.1176/ajp.154.2.185 (1997).
- 434 9 Landa, R. *et al.* Social language use in parents of autistic individuals. *Psychol Med* **22**, 245-254 (1992).
- 435 10 Piven, J. *et al.* Personality characteristics of the parents of autistic individuals. *Psychol Med* **24**, 783-795  
436 (1994).
- 437 11 Eyuboglu, M., Baykara, B. & Eyuboglu, D. Broad autism phenotype: theory of mind and empathy skills in  
438 unaffected siblings of children with autism spectrum disorder. *Psychiatry and Clinical*  
439 *Psychopharmacology* **28**, 36-42, doi:10.1080/24750573.2017.1379714 (2018).
- 440 12 Folstein, S. E. *et al.* Predictors of cognitive test patterns in autism families. *J Child Psychol Psychiatry* **40**,  
441 1117-1128 (1999).
- 442 13 Hughes, C., Russell, J. & Robbins, T. W. Evidence for executive dysfunction in autism. *Neuropsychologia*  
443 **32**, 477-492 (1994).
- 444 14 Hughes, C., Plumet, M. H. & Leboyer, M. Towards a cognitive phenotype for autism: increased prevalence  
445 of executive dysfunction and superior spatial span amongst siblings of children with autism. *J Child*  
446 *Psychol Psychiatry* **40**, 705-718 (1999).
- 447 15 Codina-Sola, M. *et al.* Integrated analysis of whole-exome sequencing and transcriptome profiling in  
448 males with autism spectrum disorders. *Mol Autism* **6**, 21, doi:10.1186/s13229-015-0017-0 (2015).
- 449 16 Tammimies, K. *et al.* Molecular Diagnostic Yield of Chromosomal Microarray Analysis and Whole-Exome  
450 Sequencing in Children With Autism Spectrum Disorder. *Jama* **314**, 895-903,  
451 doi:10.1001/jama.2015.10078 (2015).
- 452 17 O'Roak, B. J. *et al.* Sporadic autism exomes reveal a highly interconnected protein network of de novo  
453 mutations. *Nature* **485**, 246-250, doi:10.1038/nature10989 (2012).
- 454 18 Helbig, I., Scheffer, I. E., Mulley, J. C. & Berkovic, S. F. Navigating the channels and beyond: unravelling the  
455 genetics of the epilepsies. *The Lancet. Neurology* **7**, 231-245, doi:10.1016/S1474-4422(08)70039-5 (2008).
- 456 19 Bora, E., Aydin, A., Sarac, T., Kadak, M. T. & Kose, S. Heterogeneity of subclinical autistic traits among  
457 parents of children with autism spectrum disorder: Identifying the broader autism phenotype with a data-  
458 driven method. *Autism Res* **10**, 321-326, doi:10.1002/aur.1661 (2017).
- 459 20 Woodbury-Smith, M. *et al.* Using extended pedigrees to identify novel autism spectrum disorder (ASD)  
460 candidate genes. *Hum Genet* **134**, 191-201, doi:10.1007/s00439-014-1513-6 (2015).
- 461 21 Dawson, G. *et al.* Defining the broader phenotype of autism: genetic, brain, and behavioral perspectives.  
462 *Dev Psychopathol* **14**, 581-611 (2002).
- 463 22 Gould, T. D. & Gottesman, II. Psychiatric endophenotypes and the development of valid animal models.  
464 *Genes Brain Behav* **5**, 113-119, doi:10.1111/j.1601-183X.2005.00186.x (2006).



- 465 23 Icasiano, F., Hewson, P., Machet, P., Cooper, C. & Marshall, A. Childhood autism spectrum disorder in the  
466 Barwon region: a community based study. *J Paediatr Child Health* **40**, 696-701, doi:10.1111/j.1440-  
467 1754.2004.00513.x (2004).
- 468 24 Lord, C. *et al.* The autism diagnostic observation schedule-generic: a standard measure of social and  
469 communication deficits associated with the spectrum of autism. *J Autism Dev Disord* **30**, 205-223 (2000).
- 470 25 Lord, C. *et al.* Diagnosing autism: analyses of data from the Autism Diagnostic Interview. *J Autism Dev*  
471 *Disord* **27**, 501-517 (1997).
- 472 26 American Psychiatric Association. *Diagnostic and Statistical Manual of Mental Disorders, Fourth Edition,*  
473 *Text Revision (DSM-IV-TR)*. (American Psychiatric Association, 2000).
- 474 27 Wechsler, D. *Wechsler Abbreviated Scale of Intelligence*. (Harcourt Assessment Inc, 1999).
- 475 28 Delis, D. C., Kaplan, E. & Kramer, J. H. *Delis-Kaplan Executive Function System (D-KEFS)*. (Pearson  
476 Psychological Corporation, 2018).
- 477 29 Harrison, P. L. & Oakland, T. *Adaptive Behavior Assessment System - Second Edition (ABAS-II) (2nd ed.)*.  
478 (The Psychological Corporation, 2003).
- 479 30 Roth, R. M., Gioia, G. A., Guy, S. C., Kenworthy, L. & Isquith, P. K. *Behavior Rating Inventory of Executive*  
480 *Function: BRIEF*. (Psychological Assessment Resources, 2000).
- 481 31 Stone, V. E., Baron-Cohen, S. & Knight, R. T. Frontal lobe contributions to theory of mind. *Journal of*  
482 *cognitive neuroscience* **10**, 640-656 (1998).
- 483 32 Baron-Cohen, S., O'Riordan, M., Stone, V., Jones, R. & Plaisted, K. Recognition of faux pas by normally  
484 developing children and children with Asperger syndrome or high-functioning autism. *J Autism Dev Disord*  
485 **29**, 407-418 (1999).
- 486 33 Brown, N. J. *Family and community study of the genetics of Autism Spectrum Disorder* PhD thesis,  
487 University of Melbourne, (2014).
- 488 34 Goldman Eisler, F. *Psycholinguistics: Experiments in Spontaneous Speech*. (Academic Press Inc, 1968).
- 489 35 Joannette, Y. & Goulet, P. in *Discourse Ability and Brain Damage* (eds Y. Joannette & H. H. Brownell)  
490 (Springer New York, 1990).
- 491 36 Wechsler, D. *Wechsler Abbreviated Scale of Intelligence-II*. (Harcourt Assessment Inc, 2011).
- 492 37 Smith, J. A. Reflecting on the development of interpretative phenomenological analysis and its  
493 contribution to qualitative research in psychology. *Qualitative Research in Psychology* **1**, 39-54,  
494 doi:10.1191/1478088704qp004oa (2004).
- 495 38 Ward, J. H. Hierarchical Grouping to Optimize an Objective Function. *Journal of the American Statistical*  
496 *Association* **58**, 236-244, doi:10.1080/01621459.1963.10500845 (1963).
- 497 39 Luo, J. & Xiong, C. Youden index and Associated Cut-points for Three Ordinal Diagnostic Groups. *Commun*  
498 *Stat Simul Comput* **42**, 1213-1234, doi:10.1080/03610918.2012.661906 (2013).
- 499 40 Youden, W. J. Index for rating diagnostic tests. *Cancer* **3**, 32-35 (1950).
- 500 41 Duong, L. *et al.* Mutations in NRXN1 in a family multiply affected with brain disorders: NRXN1 mutations  
501 and brain disorders. *Am J Med Genet B Neuropsychiatr Genet* **159B**, 354-358, doi:10.1002/ajmg.b.32036  
502 (2012).
- 503 42 Shi, L. *et al.* Whole-genome sequencing in an autism multiplex family. *Mol Autism* **4**, 8, doi:10.1186/2040-  
504 2392-4-8 (2013).
- 505 43 Chapman, N. H. *et al.* Whole exome sequencing in extended families with autism spectrum disorder  
506 implicates four candidate genes. *Hum Genet* **134**, 1055-1068, doi:10.1007/s00439-015-1585-y (2015).
- 507 44 Salyakina, D. *et al.* Copy number variants in extended autism spectrum disorder families reveal candidates  
508 potentially involved in autism risk. *PLoS one* **6**, e26049, doi:10.1371/journal.pone.0026049 (2011).
- 509 45 Losh, M. *et al.* Neuropsychological profile of autism and the broad autism phenotype. *Arch Gen Psychiatry*  
510 **66**, 518-526, doi:10.1001/archgenpsychiatry.2009.34 (2009).
- 511 46 Billeci, L. *et al.* The Broad Autism (Endo)Phenotype: Neurostructural and Neurofunctional Correlates in  
512 Parents of Individuals with Autism Spectrum Disorders. *Frontiers in Neuroscience* **10**,  
513 doi:10.3389/fnins.2016.00346 (2016).
- 514 47 Geschwind, D. H. & State, M. W. Gene hunting in autism spectrum disorder: on the path to precision  
515 medicine. *The Lancet. Neurology* **14**, 1109-1120, doi:10.1016/S1474-4422(15)00044-7 (2015).
- 516 48 Leppa, V. M. *et al.* Rare Inherited and De Novo CNVs Reveal Complex Contributions to ASD Risk in  
517 Multiplex Families. *Am J Hum Genet* **99**, 540-554, doi:10.1016/j.ajhg.2016.06.036 (2016).

518 **Competing Interests:** The authors declare no conflicts of interest

519 **Figure Legends**

520 **Figure 1.** Scrambled pedigrees for Family A (panel A) and Family B (panel B) at recruitment.  
521 Individuals with a diagnosis of ASD are marked in black, and individuals recruited from the  
522 broader families are marked in yellow. White diamonds are individuals who were not recruited  
523 but are represented here to preserve the pedigree lines.

524

525 **Figure 2.** Iterative process used to identify and assess BAP endophenotypes.

526

527 **Figure 1.** Scrambled pedigrees for Family A (panel A) and Family B (panel B) showing  
528 phenotypes and endophenotypes. All individuals with  $\geq 1$  endophenotype had the BAP, with the  
529 exception of two individuals from Family B (III-3 and IV-9) marked with an asterisk. These  
530 individuals were clinically determined as unaffected (Family B III-3 and IV-9) but had above  
531 threshold endophenotype scores based on ROC curves. Family members who were not  
532 phenotyped are not shown to preserve the anonymity of these families.

533

534 **Figure 4.** Number of BAP endophenotypes present in Family A and B. Individuals married-in to  
535 Family A tend to have a single endophenotype, indicating a more mild BAP presentation, in  
536 contrast with core family members who have multiple endophenotypes (obsessive most  
537 frequent). In Family B, married-in and core family members tend to have more than one  
538 endophenotype, with the aloof endophenotype most frequent.

539

### (a) Family A Pedigree

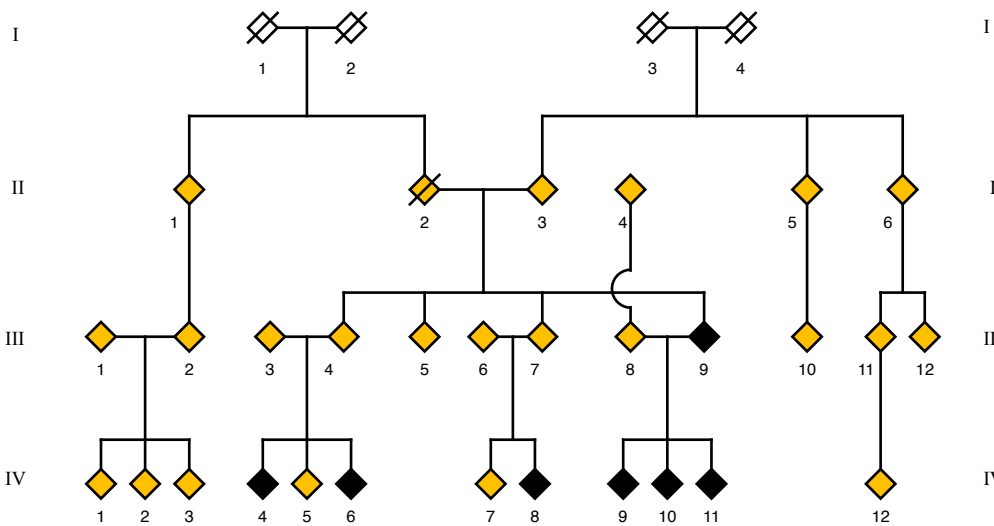

### (b) Family B Pedigree

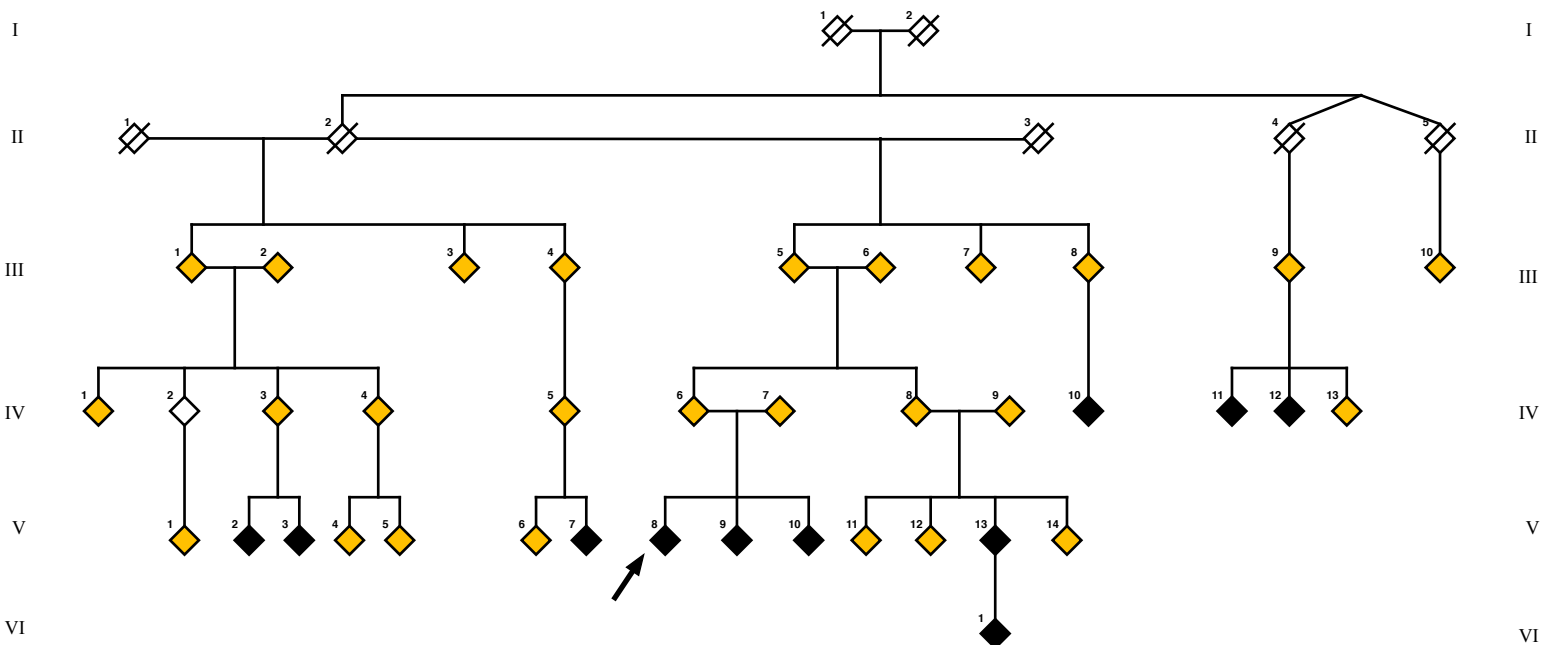

Legend: Autism Spectrum Disorder Unaffected at recruitment Not recruited

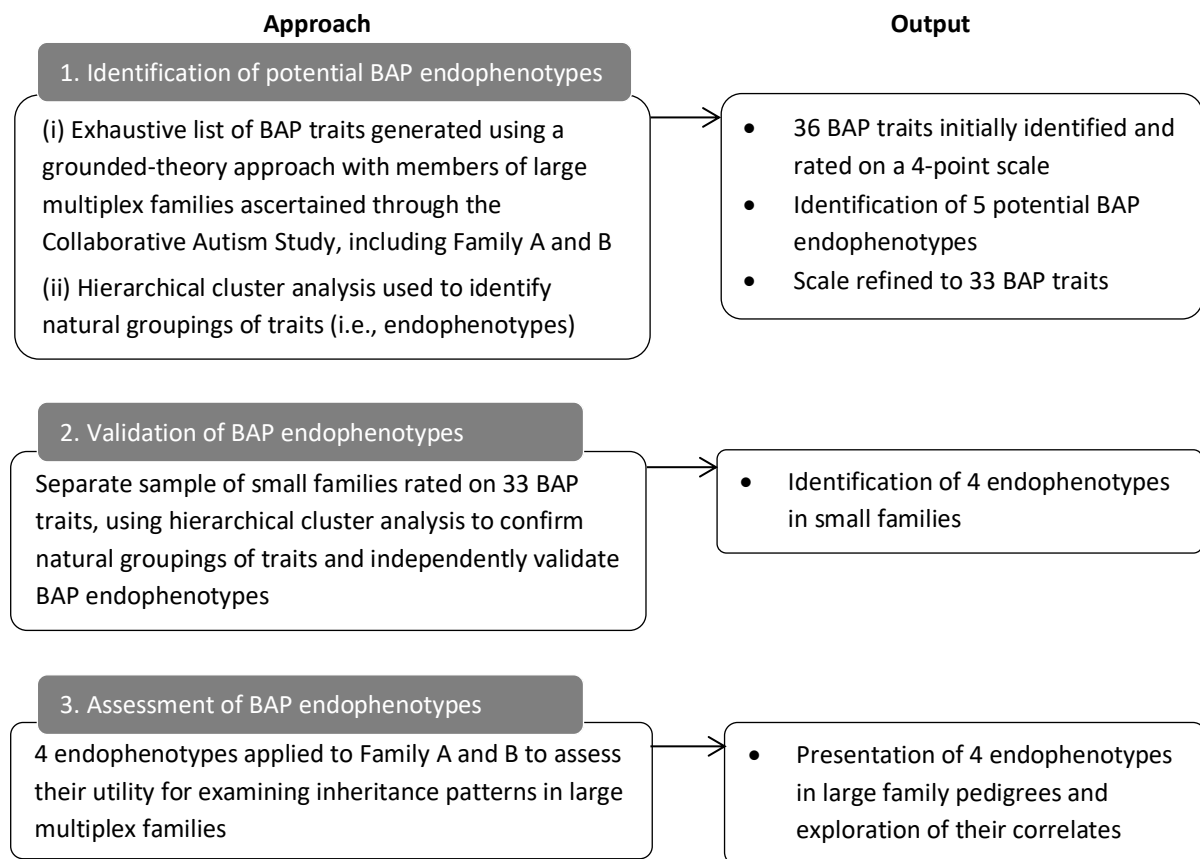

**(a) Family A Pedigree**

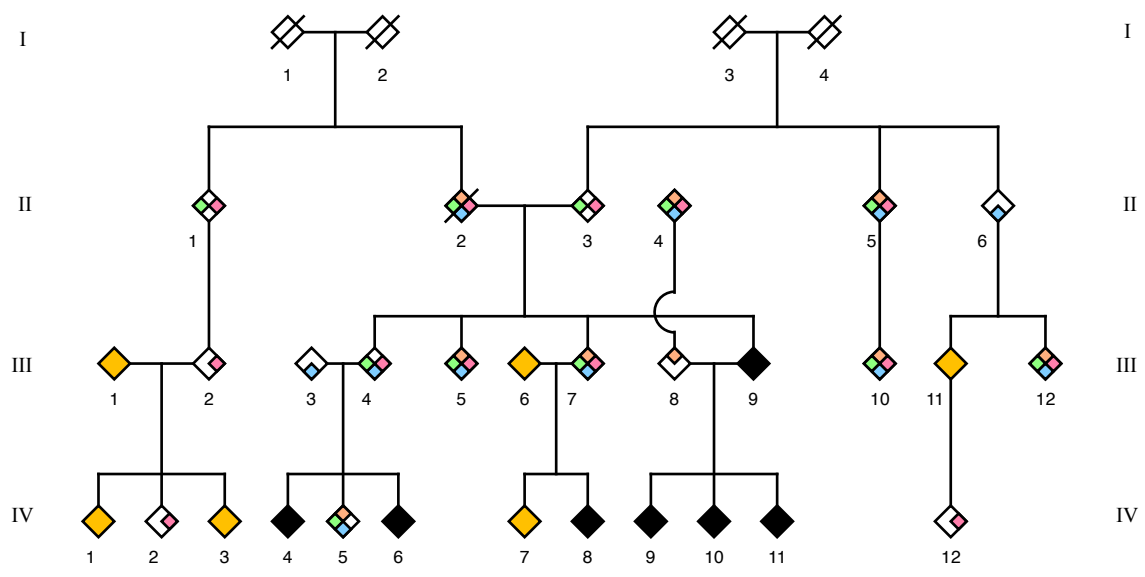

**(b) Family B Pedigree**

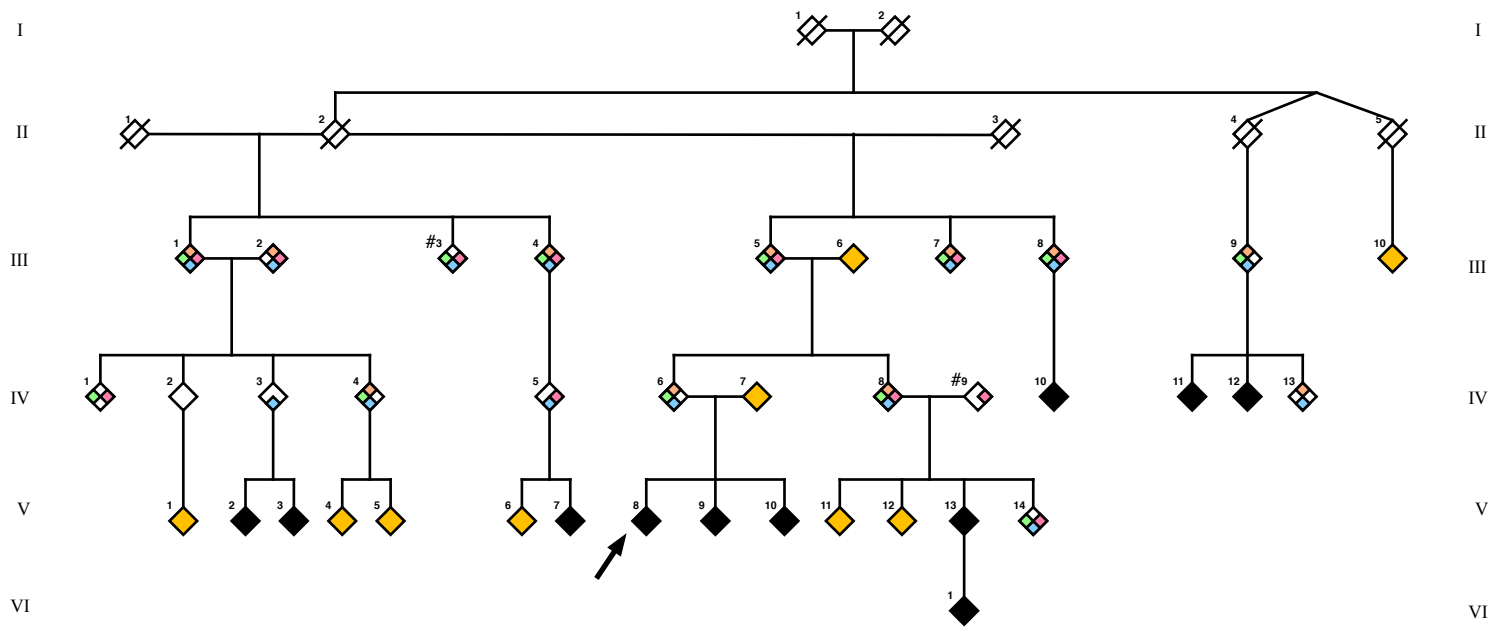

- Pedantic
- Obsessive
- Socially unaware
- Aloof
- Autism Spectrum Disorder
- Unaffected
- Not recruited

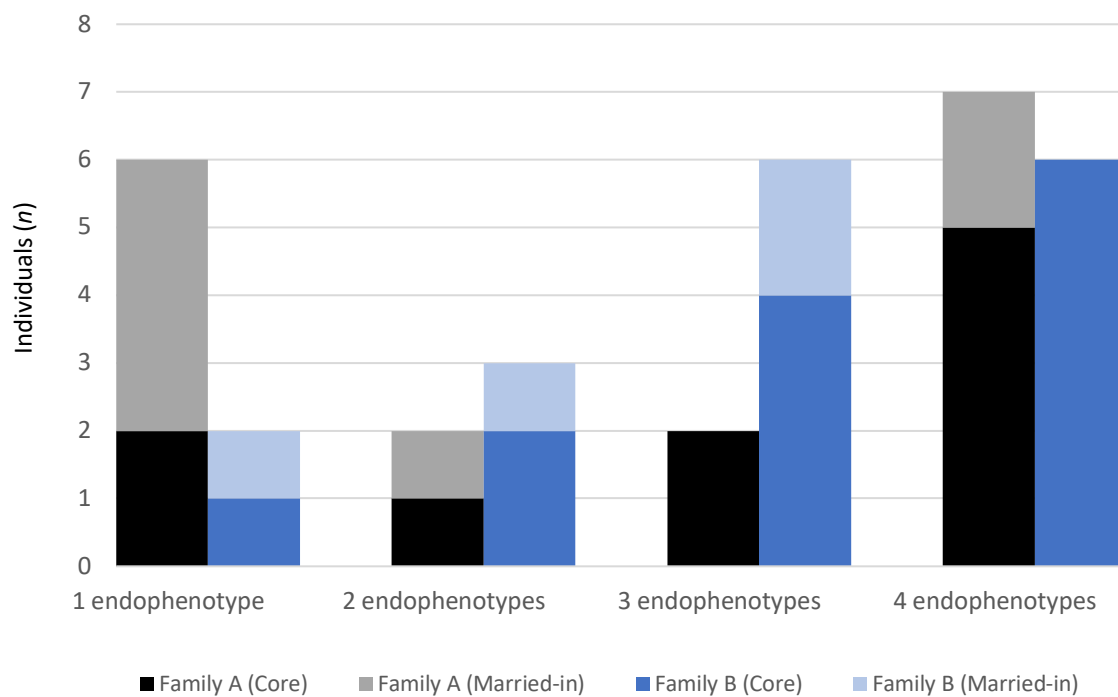

Source: https://biorxiv.org/content/biorxiv/early/2019/06/13/659722.full-text.pdf
